# Supplementary material for: A DFT study of the role of the Lewis acid catalysts in the [3 + 2] cycloaddition reaction of the electrophilic nitrone isomer of methyl glyoxylate oxime with nucleophilic cyclopentene
Source: Royal Society of Chemistry journal article supplement (doi:10.1039/c5ra09139j), 2015-01-01
Supplement: c5ra09139j1.pdf [file c5ra09139j1.pdf]

### Supplementary data

**Table S1.** B3LYP/6-31G(d), M06-2X/6-31G(d) and MPWB1K/6-31G(d) total energies (E in a.u), in gas phase of the stationary points involved in the 32CA reaction of BF<sub>3</sub>:nitron **15** complex with cyclopentene **14**

| System                            | E Gas phase |             |             |
|-----------------------------------|-------------|-------------|-------------|
|                                   | B3LYP       | M06-2X      | MPWB1K      |
| Cyclopentene <b>14</b>            | -195.326702 | -195.223333 | -195.212447 |
| BF <sub>3</sub> :nitron <b>15</b> | -722.252589 | -721.991173 | -721.97764  |
| <b>TSn-c</b>                      | -917.558343 | -917.203803 | -917.173422 |
| <b>TSx-c</b>                      | -917.576172 | -917.214804 | -917.185413 |
| <b>CAn-c</b>                      | -917.614919 | -917.276529 | -917.248971 |
| <b>CAs-c</b>                      | -917.61191  | -917.274544 | -917.245451 |

**Table S2.** MPWB1K/6-31G(d) total energies (E in a.u) in gas phase and in DCM, of the stationary points for the 32CA reactions of nitron **13** with cyclopentene **14**.

| System                 | E (a.u)     | E (a.u)     |
|------------------------|-------------|-------------|
|                        | Gas phase   | DCM         |
| Cyclopentene <b>14</b> | -195.212446 | -195.213355 |
| Oxime <b>12</b>        | -397.495984 | -397.503944 |
| Nitron <b>13</b>       | -397.487329 | -397.496214 |
| <b>TSn</b>             | -592.6754   | -592.682949 |
| <b>TSx</b>             | -592.68193  | -592.689306 |
| <b>CAn</b>             | -592.76037  | -592.767798 |
| <b>CAs</b>             | -592.76299  | -592.770522 |

**Table S3.** MPWB1K/6-31G(d) enthalpies (H, in a.u), entropies (S, in cal mol<sup>-1</sup> K<sup>-1</sup>), and free energies (G, in a.u), for the TSs and CAs involved in the 32CA between nitron **13** and cyclopentene **14**.

| System          | H           | S       | G           |
|-----------------|-------------|---------|-------------|
| <b>Oxime</b>    | -397.407435 | 85.001  | -397.44753  |
| <b>Nitron</b>   | -397.398908 | 83.499  | -397.438295 |
| <b>penetene</b> | -195.092936 | 66.598  | -195.124351 |
| <b>TSn</b>      | -592.463785 | 108.123 | -592.514787 |
| <b>TSx</b>      | -592.469919 | 108.349 | -592.521028 |
| <b>CAs</b>      | -592.544326 | 107.971 | -592.595256 |
| <b>CAn</b>      | -592.546739 | 104.531 | -592.596047 |

**Table S4.** MPWB1K/6-31G(d) total energies (E in a.u) in gas phase and in DCM of the stationary points for the 32CA reactions of the BF<sub>3</sub>:nitron complex **15** with cyclopentene **14**.

| System                            | E (a.u)     | E (a.u)     |
|-----------------------------------|-------------|-------------|
|                                   | Gas phase   | DCM         |
| Cyclopentene <b>14</b>            | -195.212446 | -195.213355 |
| BF <sub>3</sub> :nitron <b>15</b> | -721.97764  | -721.994871 |
| <b>TSn-B</b>                      | -917.173422 | -917.189837 |
| <b>TSx-B</b>                      | -917.185413 | -917.19918  |
| <b>CAn-B</b>                      | -917.248971 | -917.257919 |
| <b>CAs-B</b>                      | -917.245451 | -917.256585 |

**Table S5.** MPWB1K/6-31G(d) enthalpies (H, in a.u), entropies (S, in cal mol<sup>-1</sup> K<sup>-1</sup>), and free energies (G, in a.u), for the TSs and CAs involved in the 32CA between nitrone **13** and cyclopentene **14** in presence of BF<sub>3</sub> catalyst.

|                 | H           | S       | G           |
|-----------------|-------------|---------|-------------|
| <b>System</b>   |             |         |             |
| <b>Nitron-c</b> | -721.878669 | 106.28  | -721.928802 |
| <b>TSn-B</b>    | -916.951096 | 128.994 | -917.011944 |
| <b>TSx-B</b>    | -916.96052  | 127.791 | -917.0208   |
| <b>CAn-B</b>    | -917.015004 | 124.293 | -917.073634 |
| <b>CAs-B</b>    | -917.014714 | 118.564 | -917.070642 |

**Table S6.** MPWB1K/6-31G(d) total energies (E in a.u). in vacuum and in DCM of the stationary points for the 32CA reactions of nitrone **13** with cyclopentene **14** in presence of LiCl and Li(OMe)<sub>2</sub>

| System                                | E (a.u)       |               |
|---------------------------------------|---------------|---------------|
|                                       | Gas phase     | DCM           |
| Nitron:LiCl <b>16</b>                 | -865.3655203  | -865.4036609  |
| <b>TSx-LiCl</b>                       | -1060.5630043 | -1060.5967374 |
| <b>18</b>                             | -1060.6471804 | -1060.6811125 |
| Nitron:Li(OMe) <sub>2</sub> <b>17</b> | -869.7694020  | -869.8282334  |
| <b>TSx-Li(OMe)<sub>2</sub></b>        | -1064.9654953 | -1065.0197319 |
| <b>20</b>                             | -1065.0477482 | -1065.1020574 |

**Table S7.** MPWB1K/6-31G(d) enthalpies (H, in a.u), entropies (S, in cal mol<sup>-1</sup> K<sup>-1</sup>), and free energies (G, in a.u), for the TSs and CAs involved in the 32CA between nitrone **13** and cyclopentene **14** in presence of LiCl and Li(OMe)<sub>2</sub> catalyst

| System                            | H           | S       | G           |
|-----------------------------------|-------------|---------|-------------|
| <b>Nitron-LiCl</b>                | -865.300586 | 101.123 | -865.348286 |
| <b>TSxLiCl</b>                    | -1060.37198 | 118.184 | -1060.42773 |
| <b>18</b>                         | -1060.45081 | 126.115 | -1060.51029 |
| <b>Nitron-Li(OMe)<sub>2</sub></b> | -869,466939 | 167,176 | -869,545797 |
| <b>TSxLi(OMe)<sub>2</sub></b>     | -1064,53481 | 196,428 | -1064,62747 |
| <b>20</b>                         | -1064,61267 | 190,405 | -1064,70248 |
